# Supplementary material
Source: Springer Nature journal article supplement (https://www.springermedizin.de/resource/supplementary/13032_2014_86_MOESM2_ESM.pdf/9651594)

# Type B (displaced, stable)

**B1**  
displaced  
glenoid fractures

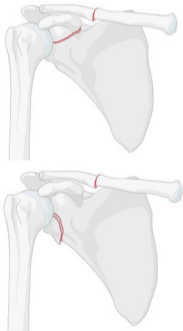

**B2**  
displaced  
scapula body fractures

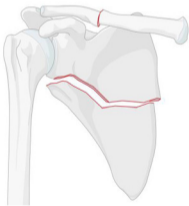

**B3**  
displaced  
scapula neck/superior border

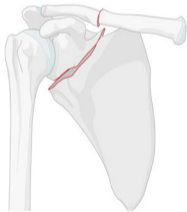

Supplement: MOESM2 [file 9651594]
